# Supplementary material for: A novel ball-in-ball hollow NiCo2S4sphere based sensitive and selective nonenzymatic glucose sensor
Source: Royal Society of Chemistry journal article supplement (doi:10.1039/c7ay01640a), 2017-01-01
Supplement: c7ay01640a1.pdf [file c7ay01640a1.pdf]

## Electronic Supplementary Material

### A novel ball-in-ball hollow NiCo<sub>2</sub>S<sub>4</sub> sphere based sensitive and selective nonenzymatic glucose sensor

Dinglong Chen<sup>a,b</sup>, Huiying Wang<sup>b</sup>, Minghui Yang<sup>a\*</sup>

<sup>a</sup>*College of Chemistry and Chemical Engineering, Central South University, Changsha, P.*

*R. China 410083*

<sup>b</sup>*College of Chemical Engineering, Shijiazhuang University, Shijiazhuang,*

*P. R. China 050035*

#### Corresponding Author

\*E-mail: [yangminghui@csu.edu.cn](mailto:yangminghui@csu.edu.cn)

Tel: (+86) 731 88836954

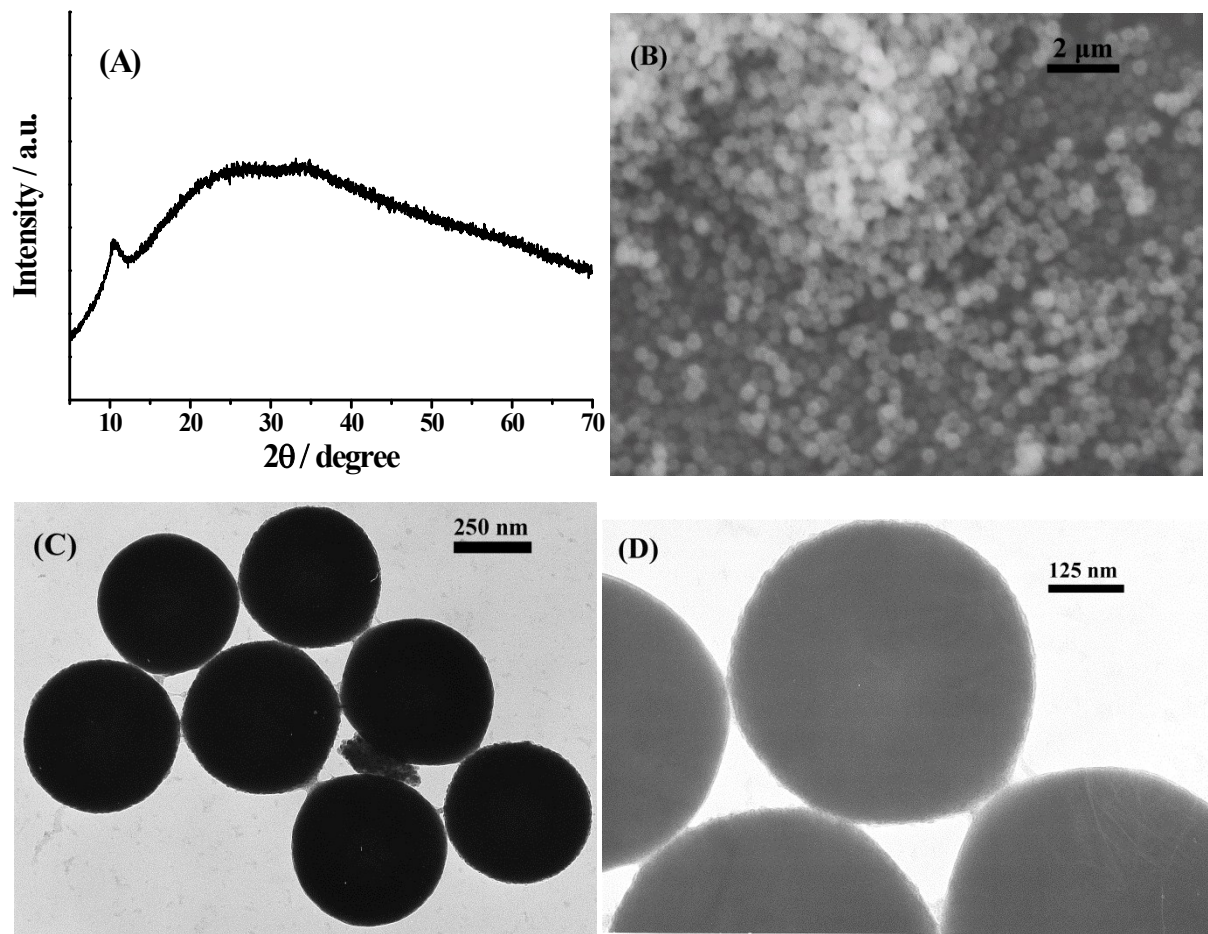

**Fig. S1** (A) XRD pattern, (B) SEM, (C) TEM and (D) enlarged TEM image of the as-prepared NiCo-glycerate nanostructures.

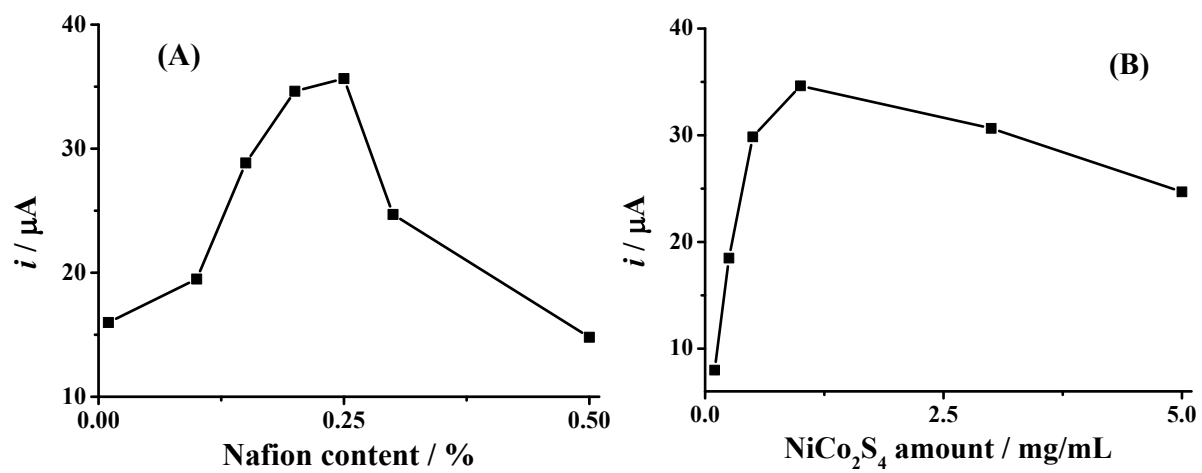

**Fig. S2** The effect of the (A) Nafion content and (B) hollow NiCo<sub>2</sub>S<sub>4</sub> amount on current response of NiCo<sub>2</sub>S<sub>4</sub>/GCE electrode to 1 mM glucose.
